# Supplementary material for: Dissecting type I and II interferon impacts on human immune cells in disease by a cell type-specific interferon response atlas
Source: Research Square preprint supplement (doi:10.21203/rs.3.rs-8197575/v1), 2025-12-23
Supplement: Supplementary file 1 [file 2e616e0882e2773f591c2d87.xlsx]

## Sheet: Table S14
Subject	Group	blood draw as NDMM	cycle 1 drug	cycle 1 (days of first blood drawn)	cycle 2 drug	cycle 1 (days of first blood drawn)	blood draw as post ind 2x	days between 2nd indc to blood drawn	Days between cycle 1&2	KIT for pretreat	KIT for post 2 cycle
FH1003	VRd	0	VRd	12	CRD	29	57	28	17	KT00134	KT00137
FH1004	VRd	0	VRd	9	VRd	30	51	21	21	KT00136	KT00138
FH1005	VRd	0	VRd	16	VRd	44	72	28	28	KT00139	KT00236
FH1006	VRd	0	VRd	0	VRd	32	62	30	32	KT00233	KT00241
FH1007	VRd	0	VRd	7	VRd	28	49	21	21	KT00234	KT00242
FH1008	VRd	0	VRd	15	VRd	36	57	21	21	KT00237	KT00244
FH1009	VRd	0	VRd	0	VRd	21	43	22	21	KT00239	KT00243
FH1010	VRd	0	VRd	3	VRd	24	45	21	21	KT00247	KT01317
FH1011	VRd	0	VRd	15	VRd	36	57	21	21	KT01316	KT01334
FH1012	VRd	0	Vd	10	VRd	31	52	21	21	KT01315	KT01333
FH1014	VRd	0	Vd	6	VRd	28	48	20	22	KT01348	KT01358
FH1017	VRd	0	Vd	13	VRd	34	62	28	21	KT02047	KT02070
FH1018	VRd	0	VCd	0	VRd	21	42	21	21	KT02050	KT02068
FH1019	DVRd	0	DVRd	19	DVRd	-	64	-	-	KT02080	KT02688
FH1020	DVRd	0	DVRd	22	DVRd	51	72	21	29	KT02726	KT02752
FH1021	VRd	0	Vd	22	VRd	43	64	21	21	KT02728	KT02750
FH1022	DVRd	0	DVRd	28	DVRd	56	77	21	28	KT02757	KT02739
FH1023	DVRd	0	DVRd	28	DVRd	56	84	28	28	KT04689	KT04825
FH1024	DVRd	0	DVRd	7	DVRd	35	63	28	28	KT04811	KT04838
FH1026	DVRd	0	DVRd	5	DVRd	36	60	24	31	KT04835	KT04845
FH1027	DVRd	0	DVRd	31	DVRd	59	87	28	28	KT04836	KT05116
FH1028	DVRd	0	DVRd	19	DVRd	48	76	28	29	KT05130	KT06429
