# Supplementary material for: Dissecting type I and II interferon impacts on human immune cells in disease by a cell type-specific interferon response atlas
Source: Research Square preprint supplement (doi:10.21203/rs.3.rs-8197575/v1), 2025-12-23
Supplement: Supplementary file 2 [file 385c9062733d587de8fbcd35.xlsx]

## Sheet: Table S3
Monocyte	NK	Bcell	Bcell_Monocyte	Bcell_NK	Tcell	Tcell_NK	Tcell_Bcell_NK	Tcell_Bcell_NK_Monocyte	Monocyte	NK	Bcell	Bcell_Monocyte	Bcell_NK	Tcell	Tcell_Bcell_NK	Tcell_Bcell_NK_Monocyte
Upreg	Upreg	Upreg	Upreg	Upreg	Upreg	Upreg	Upreg	Upreg	Downreg	Downreg	Downreg	Downreg	Downreg	Downreg	Downreg	Downreg
CCL8	FASLG	TLR7	SIGLEC14	ODF3B	LAMP3	MT2A	IFI44L	ISG15	CCL24	FGFBP2	SESN3	CD44	LY9	TOMM7	EEF1G	EEF2
IFI27	SCO2	CCSER1	KIAA0040	AGRN	PGAP1	SP100	IFI6	OAS1	FN1	KLF2	PFKFB3	RGS2	ARRDC2	ACTG1	PNRC1
MS4A6A	LPIN2	MACROD2	MNDA	JAK2	RARA	SPATS2L	OAS3	CMPK2	SDC2	HOPX	N4BP3	CD82	YPEL3	FBL	EIF3L
SERPING1	IL15RA	RTCB	WDFY1	TENT5A	UTRN	SLFN12L	IFI44	IFIT1	THBS1	MATK	SNX9	GLIPR1	NOP53	HADHA	EIF4B
APOBEC3A	FNDC3B	STAG3	APOL3	USP25	ATP10A	GPR155	MX1	RSAD2	BTG1	S1PR1	ATG16L2	CHST11	KDM2B	APBB1IP	COX4I1
IFITM3	PCGF5	SAMHD1	TENT4A	USP15	DAPP1	ALOX5AP	IFIT3	LY6E	VMO1	GPR68	C16orf74	UBXN11	CERK
CXCL10	WHRN	INPP1	CASP4	TRIM56	STIMATE	KPNB1	XAF1	IRF7	CD52	RASGRP2	TBC1D9	TGFBR2	RAB37
OTOF	CTSS	PLAC8	PLEKHO1	TMEM123	UBQLN2	HELB	MX2	IFIT2	PID1	PLXND1	TRIO	RASSF2	RACK1
CTSL	NFIL3	RABGAP1L	IRF2	EHD4		OGFR	HERC6	USP18	NFXL1	KLRB1	TAGLN2
TCN2	SBK1	CPNE5		PSME1		YEATS2	OAS2	ZBP1	MT-CO3	LAPTM5	FAM43A
IL4I1	PARP4	CLEC2D		ARHGEF3			SAMD9L	OASL	CXCL16	FGR	DPEP2
CALHM6	APOL1	FCHSD2		SCML4			EIF2AK2	ISG20	PHLDA1	CBX7	TCP11L2
KLF6	SPOCK2	STAP1		CD48			HERC5	IFIH1	MT-ATP6	RBL2	INPP5A
MEFV	GTPBP2	RAC2		PIK3AP1			PLSCR1	IFITM1	MT-ND4	CEP78	FXYD5
RGL1	ENDOD1	C12orf74		ZC3HAV1			TRIM22	DHX58	VCAN	PLEKHG3	PRDM4
SECTM1	C1GALT1	ATP13A1		CFLAR			EPSTI1	TNFSF10	GSN	PTGDR	EHD3
CXCL11	KLRD1	TAPBP		GSDMD			DDX60L	NT5C3A	CPQ	NMUR1	PIM1
FGL2	PRF1	FGD2		TMSB10			PARP9	IFITM2	LIPA	SEPTIN9	FAM111B
MS4A4A	TIPARP	ZNF92		TRIM26			DDX60	TAP2	EREG	CYTH4	MOB3A
MARCKS	CXorf21	B3GNT2		SLC38A5			HELZ2	NAPA	MT-ND3	ATP9A	RIN3
VAMP5	SMAGP	GNB4		CNDP2			PARP12	TAP1	ACADVL	CD244	TTC3
CD300E	C6orf62	TMEM268		ELF1			BST2	TRAFD1	RHBDD2	ITGAM	EMILIN2
HESX1		RASGRP3					SAMD9		AHNAK	DAPK2	SLC49A4
ITGB7		ELK4					PARP14		RAB7B	NLRP1	VAT1
CMKLR1		SECISBP2L					DDX58		RNASE6	RASGRP1	TNS3
SNX10		EVL					IFIT5		MS4A7	SMAP2	LYST
ANXA4		DCK					TRIM25		PECAM1	AKT3	CXCR4
CCR5		NAGK					HSH2D		FABP5	ADAMTS10	KLHL2
CDKN1A		RERE					LGALS9		MT-CYB	KLRK1	HERPUD1
ATOX1		ITGA4					SP110		MT-CO2	ARRB1	EZR
SDC3		CHSY1					RNF213		LTA4H	KLRG1	GAB2
SAMD4A		PSMB10					DTX3L		FCGRT	SLC9A3R1	CHPT1
DYSF		TCIRG1					RTP4		MMP19	SEMA4C	GPX4
GIMAP7		UBALD2					IFI35		MT-ND4L	PRR5L	FURIN
CCR1		CD2AP					UBE2L6		PLXDC2	SGSH	MAPK8IP3
SLAMF7		IDH3A					STAT2		LSP1	VASH1	FNBP1
SDS		RUNX3					DRAP1		GPRIN3	NIBAN1	PTOV1
RIN2		JUP					PARP10		MT-ND5	IGF1R	FADS3
CFB		LNPEP					IFI16		SLC16A10	HERC1	PRDM2
MDK		SELL					TYMP		FAM107B	SAMD1	LSR
LILRB4		MCOLN2					STAT1		MS4A14	CHD3	HPCAL1
LMNB1		RAB8A					ADAR		ATP13A3	UBA52	C12orf42
ACOT9		SIDT1					LAP3		RNASE1	CSK	UCP2
CGAS		PARP8					SAT1		NAV1	ARL4C	B4GALT1
CREG1		TRIB1					TNK2		SLC5A3	FLNA	CKLF
IFI30		VRK2					NMI		ABCC3	MAPKAPK2	IL16
ADAMDEC1		MFN1					TRIM5		PLAUR		BACH1
APOL2		DIP2B					PHF11		HIST1H1C		KLHL5
RUFY4		DNAJA1					SHFL		FBP1		TPCN1
PPDPF		ELMO1					TRANK1		SORL1		KAT6B
XCR1		PRKAG2					PRKD2		KCNAB2		RFTN1
FZD2		GPR180					TMEM140		ZFP36L1		RUBCNL
AIM2		ELF4					N4BP1		TGFBI		AFF3
GRN							APOL6		SLC11A1		WNK1
NADK							SMCHD1		FTH1		FER
CD72							CMTR1		HIPK2		BRI3
CD274							TDRD7		HIF1A
MDM2							NUB1		POR
ABHD12							PPM1K		ATP6AP2
PLAAT4							PI4K2B		SH3BGRL3
LILRA5							ZCCHC2		LRP1
DEFB1							MOV10		MT-ND2
NINJ1							ECE1		CAT
CTSD							ZNFX1		ATP2B1
MYO1G							TRIM21		TBXAS1
MXD1							SP140		PDE1B
FYB1							TBC1D1		ITGAX
CD47							CNP		DLG4
CST3							TRIM38		FOS
PTPA							CHMP5		SLC43A2
LAIR1							MYD88		AQP9
OPTN							RBCK1		NAB2
ADA2							PML		PFDN5
ZBED1							SHISA5		ANPEP
GIMAP5							UNC93B1		FAM20C
CD80							CHST12		PALLD
C2							IRF9		PPT1
TMBIM1							TRIM14		PTGS1
CFD							ANKFY1		PARVG
ARL8A							PARP11		APLP2
CUL1							CD164		AMPD2
CIR1							MCL1		APMAP
PARP15							AZI2		SAMHD1
GCNT1							PSMB8		COTL1
IQGAP2							DYNLT1		KCNC3
SEMA4A							GTPBP1		LST1
DDIT3							UBA7		TBC1D8
BRI3							CCDC85B		TGOLN2
LAMP1							BAG1		ARHGAP9
UBE2Z							TRIM34		RAC2
DNASE2							PSMB9		ETS2
IRF2BPL							RNF31		RASA1
LTBR							XRN1		SIGLEC9
ARHGEF10L							CAPN2		KYNU
PLA2G4C									ATXN1
LILRA6									ALCAM
TBC1D2									DOCK5
GCH1									ST14
SUSD1									ARRB2
IGSF6									AHRR
GLMP									ZMYND15
FNIP2									SATB1
ARHGAP17									CLEC4E
BAX									IVNS1ABP
IER5									JARID2
AMDHD2									YBX1
ANXA2									LCP1
CYBA									MAN2B1
IL27									BTG2
TRIP6									SND1
ARHGEF11									GAPT
									PIK3R5
									SNRNP200
									NUMB
									STT3B
									TUBGCP2
									RAB34
									C5AR2
									HK1
									NCKAP1L
									CSF1R
									ITGB5
									ITPR1
									APP
									SH3BGRL
									TMED10
									PDE4A
									ZFP36L2
									PPM1M
									ATM
									SPCS1
									H3F3A
									RAB13
									SDCCAG8
									TSPAN3
									EIF4G3
									CEP170
									ENG
									WBP1L
									ZNF106
									CPNE1
									ITGB1
									GANAB
									DAP
									SKAP2
									ADI1
									CALM2
									MEF2C
									REL
									NDUFV1
									MEF2D
									HCLS1
