# Supplementary material for: Dissecting type I and II interferon impacts on human immune cells in disease by a cell type-specific interferon response atlas
Source: Research Square preprint supplement (doi:10.21203/rs.3.rs-8197575/v1), 2025-12-23
Supplement: Supplementary file 3 [file 408bb2ba3cbd6253c594e2f3.xlsx]

## Sheet: Table S13
Type II IFN specific
Mono specific	B specific	T specific
TNFAIP3	PMAIP1	USP15
ETV7	UBE2J1
ANKRD22	IDH2
PIM1	EAF2
BCL2A1	SPPL2A
TNF	NPC2
GAS6	CYLD
CD69	STAT3
FCGR1A	SOD2
FCGR1B	ANKRD13A
EAF1
FMNL2
DDX21
ICAM1
IL31RA
ATXN7
PSME2
MYOF
SLAMF8
IL15RA
PSMA2
FUT4
PSTPIP2
PFKP
STX11
IFIT3
RALGDS
IL12RB1
ITGAL
PLEK
STOM
RAB5IF
TIFA
ATF5
PDE4B
SFT2D2
APOL1
SLC6A12
TAPBP
BLOC1S1
POMP
SLC8A1
XKR8
IRF8
PPARGC1B
SNTB1
ST3GAL5
SLC31A2
LIMK2
CD40
CASP7
AKIRIN2
GYPC
S100A6
MICAL1
FCER1G
DRAM1
DESI1
JAK2
AGPAT3
MIIP
RCN1
RAB39A
DEK
MTHFD2
KDM1B
TLR7
PSMA4
FPR1
ERO1A
RUFY3
S100A10
DENND1B
DNAJC15
GM2A
RNF19B
SQOR
GRAMD1B
SNX8
B4GALT5
ASGR2
VOPP1
ASCL2
TICAM2
CCDC50
P2RX7
PSMB8
RABGGTA
LARP1
CAMK2D
TNFAIP2
UBE2D1
DECR1
USP6NL
LPCAT2
PSEN2
SERPINA1
VPS9D1
CCRL2
GSTK1
SMCO4
PRR5L
DTNBP1
AKT1S1
RNH1
TEP1
ASPHD2
SCPEP1
EDEM1
FAM241A
POLB
STX3
PDIA3
DNPEP
CSF2RB
CBR1
KLF4
SCARF1
IL18BP
SLC20A1
MAP4
SRI
FNBP1
PTTG1IP
RHOU
PRPS2
KARS
PSMB2
PLBD1
FARP2
EDEM2
AKR1A1
IL15
CCSER2
