# Supplementary material for: Dissecting type I and II interferon impacts on human immune cells in disease by a cell type-specific interferon response atlas
Source: Research Square preprint supplement (doi:10.21203/rs.3.rs-8197575/v1), 2025-12-23
Supplement: Supplementary file 4 [file 4f8bebad4af2a8bdba322274.xlsx]

## Sheet: Table S15
Disease Category	Subgroups	Cell Type	Subject #	Control Subject #	Seq Tech	Ref
Aging in Healthy	Female	PBMC	6	6	10x, 3' v3	Gong, Q et al., Nature 2025
	Male	PBMC	6	6
Autoimmunity	SLE, Flare	PBMC	14	10	10x, 3' v2	Perez, RK et al., Sci 2022
	SLE, Managed	PBMC	10
	RA, ACPA+	PBMC	10	4	10x, 3' v2	Wu, X et al., Nat Comm 2021
	RA, ACPA-	PBMC	10
Infection	Acute COVID, Mild	PBMC	4	4	10x, 3 v3	Lee, JE et al., Sci Immunol 2020
	Acute COVID, Severe	PBMC	6
	Flu, Severe	PBMC	5
	Long COVID	PBMC	8	2	10x, 3 v3	Li, C et al., Sci Tran Med, 2024
	Malaria	PBMC	3	2	10x, 3 v3	Dooley, NL et al., Nat Comm 2023
Myeloma	MGUS	BMMC	5	9	10x, 3' v2	Zavidij, O et al., Nat Cancer 2020
	SMM	BMMC	11
	MM	BMMC	7
