# Supplementary material for: Dissecting type I and II interferon impacts on human immune cells in disease by a cell type-specific interferon response atlas
Source: Research Square preprint supplement (doi:10.21203/rs.3.rs-8197575/v1), 2025-12-23
Supplement: Supplementary file 5 [file 6c48ac78430b02db83af85b9.xlsx]

## Sheet: Table S7
Monocyte	Bcell	Bcell_Monocyte	Tcell_Bcell	Tcell_Bcell_Monocyte	Monocyte	Bcell	Bcell_Monocyte
Upreg	Upreg	Upreg	Upreg	Upreg	Downreg	Downreg	Downreg
IDO1	TYMP	WARS	PARP9	GBP5	THBS1	C16orf74	GPR183
CALHM6	RNF213	PSMB9	EPSTI1	GBP1	RNASE1	DPEP2	RNASE6
CXCL9	ISG20	NUB1	TRIM22	STAT1	CCL24	N4BP3	CD44
CXCL10	ZNF267	B2M	UBE2L6	GBP4	FN1	SESN3	RGS2
SERPING1	PMAIP1	ARHGEF3	TMEM140	GBP2	VCAN	ARRDC2	CD82
CXCL11	BST2	ISG15	DTX3L	SAMD9L	SDC2	KDM2B	ITPKB
VAMP5	EAF2	CASP4	PARP14	TAP1	CD14	KLF2	EMILIN2
CD38	SLAMF1	IFI35	SYNE2	APOL6	STAB1	SNX9	LFNG
SLAMF7	IFI6	IFIT2	OAS2	IRF1	MMP19	WHRN	PECAM1
ANKRD22	DRAP1	IRF2	IRF9	APOL2	VMO1	RASA3	REL
SELL	LY6E	WDFY1		SOCS1	BTG1	CENPM	MAP2K3
CD274	SOD2	LAP3		PLAAT4	LGMN	AHNAK	GGA2
IFI27	OAS1	TMSB10		PSME1	CD163	PRDM4
LMNB1	NMI	KIAA0040		XRN1	ENG	SPOCK2
SLAMF8	ERAP2	CNDP2		PSMB10	EREG	LY9
APOL4	MX1	CDC42SE2		TRAFD1	PID1	PHACTR1
FGL2	STAT3	LPIN2		PARP12	C5AR1	FAM43A
MS4A6A	BASP1	LACTB		SBNO2	CD300E	PIK3IP1
CD40	ZNFX1	MVP			FOS	CHST11
FCGR1B	SPPL2A	PALM2-AKAP2			CD36	TNFRSF13C
ITGB7	ADAR	VRK2			MS4A7	HERPUD1
MYOF	BCL6	RMC1			PDK4	TCP11L2
SDC3	UBE2J1	FGD2			AQP9	LYST
LRRK2	MAT2B	NAPA			MS4A14	SLC6A16
APOL1	L3HYPDH	CD74			ZFP36L1	ZBTB16
PIM1	IFI16	DCK			GLIPR1	GRASP
GCNT1	PLSCR1	SNX10			GPNMB	PFKFB3
FCGR1A	GNB4	TNFRSF14			PHLDA1	ZNF318
SECTM1	NPC2	RIPK2			NFXL1	AC119396.1
P2RY6	IDH2	ADGRE5			HIF1A	CEMIP2
CFB	ANKRD13A	BAZ1A			RHBDD2	FXYD5
AIM2	TCIRG1	NUCB1			UBXN11	TRIO
CTSC	RAC2	IFITM2			C5AR2	C12orf42
GM2A	STAT5A	RFX5			IER3	INF2
PSTPIP2	GDI2	CIITA			SEMA6B	S1PR4
IL18BP	CFLAR				CPQ	HIP1R
GCH1	ITGA4				CD300LB	MGAT5
SLC1A5	CYLD				PLA2G7	P2RX5
TNFAIP2	CMTR1				LRP1	EZR
C2	BANK1				TGFBI	ARHGEF18
CSF2RB	BLNK				CYP1B1	KLF7
JAK2	SLC25A32				APLP2	MKNK2
SEPTIN4					ACADVL	CTNND1
APOBEC3A					JAKMIP2	NLRP1
TCN2					PIK3R5	BLK
TGM2					SRGN	INPP5A
IRF8					FABP5	FADS3
ACOD1					TNFRSF11A	IER5
ATF5					PLD3	CLCF1
TAGAP					PALLD	SH3TC1
CLEC10A					TBC1D8	CD83
HVCN1					FTH1	MAN2A2
SAMD4A					EEPD1	NIBAN3
HSPA8					CEBPD	BCL7A
SELPLG					CSF1R	CHPT1
SMCO4					H1F0	PRDM2
MEFV					ABCC3	RAB37
OPTN					KYNU	FER
IDO2					IER5L	WDFY2
RSAD2					ADGRE2	S100A4
TIFA					SLC43A2	SGSH
ASCL2					HIST1H1C	POU2AF1
FAM241A					H1FX	SMAP2
CCR2					SLC44A1	PARVB
FBXO6					ABCC5	MANBA
LIMK2					TSPAN3	MAPK8IP3
STX11					TIMP1	IL16
FZD2					RAB7B	BPTF
PLEKHO1					SLC7A11	IQSEC1
CUL1					SLC5A3	RAPGEF1
SERPINA1					APBB3	RASSF2
SNX20					TTYH3	KLHL2
CDKN1A					CXCL16	ATP2A3
LYZ					ARRB2	TP53I11
PLBD1					ARHGAP26	MSN
VOPP1					GPRIN3	CLEC17A
CMKLR1					ADAM9	VEGFB
PDCD1LG2					TRPS1	PPFIBP2
RAPGEF2					TNFRSF1B	CAPG
TIFAB					PDE1B	ATG16L2
SLC6A12					HOMER3	QPCTL
ST3GAL5					POR	AKNA
TMEM109					CD84	FCHO1
IL15RA					AHR	MGMT
USP6NL					PPBP	BACH1
CTSH					SLC11A1
DRAM1					METRNL
SLC8A1					AVPI1
ATOX1					DAB2
PFKP					RCBTB2
RSU1					NPL
FOXN2					FCGR3A
S100A6					HIPK2
P2RX7					DUSP1
CGAS					OGFRL1
SQOR					GASK1B
GOLM1					SIGLEC9
PSMB8					ATP8B4
P2RY14					C9orf72
VPS9D1					OAZ2
B4GALT5					TBXAS1
MTHFD2					BTG2
KLF6					CAMK1
CAMK2D					SEC62
KDM1B					SIRPA
TLR7					PLEKHO2
ZNRF2					SWAP70
IGSF6					DMXL2
PCYT1A					ATP2B1
STOM					ARHGDIB
SCPEP1					FMN1
IFITM3					ATP13A3
GIMAP7					MEF2D
FYB1					MT-ND3
RNH1					TGFBR2
PLEK					ANXA1
CD72					CLEC4A
GSTK1					DLG4
SCIMP					RAB34
TNFSF13					ST3GAL2
IL31RA					CERS2
TAPBP					FAM13A
SFT2D2					NLRC4
RHOU					IFNGR1
AGPAT3					SATB1
GSAP					PLPPR2
PSME2					MX2
SLC15A4					ADA
SEMA4D					LMNA
ITGAL					DGKA
ATG3					NUMB
MUC1					ABCA1
PRR5L					AHRR
PRDX1					NAV1
S100A10					WIPF1
CISH					CD99
NCF2					AMPD2
DENND1B					IFI6
CTSZ					WBP1L
HPS5					CAB39
IGF2R					EMP1
CAST					MT-ND4
LPGAT1					TPCN1
PSMA4					FGD4
SFMBT2					SGPL1
ARNTL2					GPR162
FMNL2					MMP14
MSRB1					SLA
KLF4					MILR1
SNX8					CHD3
SLC31A2					NUMA1
RAB5IF					PLXND1
ZBP1					RASA1
ARHGAP17					WDTC1
XKR8					PI4K2A
PDIA3					FHL3
MICAL1					CPED1
RNF19B					ARHGEF40
TFEC					MT-ATP6
UBE2Z					FOXO3
RNF149					NEK6
RALB					DRAM2
IFIT3					NRP1
PPA1					FUCA1
RUFY3					HAVCR2
LPCAT2					PDE4A
KCTD12					GALC
PAK1					PNKD
ASPHD2					MXD1
PSMF1					TACC1
GRAMD1B					PITPNM1
ICAM1					SRA1
RAB39A					MT-ND4L
LIMD1					PLOD1
HELB					CEP170
PRCP					RIN2
STX3					SERINC1
DNAJC15					CCDC88A
IL12RB1					GNA15
CDCP1					HNMT
AKT1S1					ITGAV
CASP10					ZEB2
PDP1					HMG20B
MIIP					CREM
CST3					BMP2K
FARP2					HCST
HERPUD1					ARL4C
DAPP1					NISCH
SLC20A1					DUSP6
SCARF1					HEXB
RIPOR2					GGA1
RCSD1					MOB3A
N4BP2L1					CTDSP1
TNF					TRIM8
MAP4					BAZ2B
NME2					TET2
IL27					PPARD
DOCK7					JARID2
ALAS1					FCHO2
ERO1A					TUBGCP2
ETV7					YPEL2
RGS3					AP2A2
CD1D					RNF130
CCDC50					DUSP2
GAS6					CRYL1
RCN1					MT-CO3
CCDC88B					NFAT5
EDEM2					ATXN1
TRPM2					PPP1CB
FPR2					ADIPOR1
BLOC1S1					TTYH2
SLC12A7					ZMYND15
FAM20A					JMJD1C
FAR1					SETD1B
GART					PAPSS1
LEPROTL1					HCLS1
CD69					ZNF219
FGR					COMT
SASH1					MT-ND2
ATP6V1B2					IFIT1
AKIRIN2					MEF2C
SRI					B4GALT1
GLS					PMP22
KARS					ARHGEF2
CENPJ					FOSL2
EAF1					MCOLN1
GLRX					ADAM10
DDX21					BCL3
FCER1G					HCK
ASGR2					TMED10
DNPEP					FAM168A
TNFAIP3					ZMYM2
SNTB1					PNPLA6
PLA2G4C					NCOR1
EDEM1					HECA
BTN3A2					FOXP1
LAT2					TDP2
BTN3A1					GNAQ
LY75					PLAUR
DECR1					RSPH3
NOD2					KCNAB2
PRPS2					MT-CO2
BTN3A3					ACP5
C19orf12					SLC36A1
FNBP1					CHST7
CASP7					ARHGAP18
LST1					LTA4H
PPARGC1B					EPB41L3
DEK					PHC2
DOP1A					PER1
PSMA2					DDX60L
SUSD6					MACF1
AXL					DOK2
IGFLR1					TNS1
RNF115					SAMHD1
CCRL2					HGSNAT
GYPC					DENND11
KDSR					TRIB1
AKR1A1					WNK1
CMPK2					TM9SF1
POMP					TMF1
RAB12					TPP1
MTHFD1					DDX3X
RABGGTA					ZNF331
VAMP8					CEPT1
BRI3					PGPEP1
TICAM2					DEF6
HNRNPF					AP2M1
TLR8					TNRC18
BCL2A1					PPT1
TIMM10					CYB5R1
FRRS1					SFXN3
SNX27					CREBRF
IL15					ERF
FPR1					MB21D2
NIBAN1					ANXA11
DDB2					UBAC2
FUOM					GTF2F1
LARP1					SOCS6
PRRG4					ATF6
PTTG1IP					LBR
TAGLN					P2RX1
TANK					MED25
MTG1					WDFY3
NCF4					ITGAX
AP1AR					SAT1
DESI1					ZSWIM6
IDH1					PLA2G15
KDM7A					MT-ND1
DBNL
RALGDS
TOP1
PDE4B
SOS1
IL6R
DTNBP1
TEP1
POLB
PSEN2
UBE2D1
TBC1D2B
ATXN7
FUT4
EXOC2
CCSER2
PSMB2
FGD6
RANGAP1
PSMC2
LRRC8C
ERICH1
CBR1
TRAF2
