# Supplementary material for: Dissecting type I and II interferon impacts on human immune cells in disease by a cell type-specific interferon response atlas
Source: Research Square preprint supplement (doi:10.21203/rs.3.rs-8197575/v1), 2025-12-23
Supplement: Supplementary file 6 [file 9549fe5e45fd6ffdcac08c0d.xlsx]

## Sheet: Table S16
Panel	Target	Clone	Fluorophore	Manufacturer	Catalog	Host Species	Isotype
E	APOL1	1G12D11	Coralite+ 647	Proteintech	CL647-66124	Mouse	IgG2a
C	CCR1 (CD191)	5F10B29	AF488	BioLegend	362906	Mouse	IgG1 k
C	CCR5 (CD195)	2D7/CCR5	BV711	BD	563395	Mouse	IgG2a, κ
B	CD11c	Bu15	FITC	BioLegend	337214	Mouse	IgG1, κ
All	CD14	M5E2	BUV395	BD	569102	Mouse	IgG2a, k
All	CD16	3G8	BV421	BioLegend	302038	Mouse	IgG1, k
A	CD300e	UP-H2	APC	BioLegend	339712	Mouse	IgG1 k
B	CD31	WM59	BV785	BioLegend	303147	Mouse	IgG1, κ
D	CD38	HIT2	BV785	BioLegend	303529	Mouse	IgG1, κ
A	CD40	5C3	AF488	BioLegend	334318	Mouse	IgG1, κ
B	CD52	QA19A22	APC	BioLegend	318906	Mouse	IgG2a, k
C	CD62L	DREG-56	APC	BD	559772	Mouse	IgG1 K
B	CD64	S18012C	PE	BioLegend	399504	Mouse	IgG1, κ
A	CD83	HB15e	BUV737	BD	612823	Mouse	IgG1 K
E	Cathepsin D	EPR3057Y	PE	Abcam	ab305650	Rabbit	IgG
E	Cathepsin L	33/2	AF488	Santa Cruz Biotechnology	sc-32320	Mouse	IgG1, κ
D	CXCL10	J034D6	PE	BioLegend	519504	Mouse	IgG2a, k
D	CXCL9 (MIG)	J105E10	APC	BioLegend	357906	Mouse	IgG2a, k
E	IFNGR1 (CD119)	GIR-208	RB780	BD	755459	Mouse	IgG1 K
A	MS4A4A	818112	PE	R&D Systems	FAB7797P	Mouse	IgG2b
C	PDL1 (CD274)	29E.2A3	PE	BioLegend	329706	Mouse	IgG2b, κ
D	TGFBI	Polyclonal	Coralite+ 488	Proteintech	CL488-10188	Rabbit	IgG
Iso	Rabbit IgG isotype control	polyclonal	Coralite+ 488	Proteintech	cl488-30000	Rabbit	IgG
Iso	Rabbit IgG isotype control	EPR25A	PE	Abcam	AB209478	Rabbit	IgG
Iso	Mouse IgG isotype control	MOPC-173	PE	BioLegend	400211	Mouse	IgG2a, k
Iso	Mouse IgG isotype control	MG2b-57	PE	BioLegend	401207	Mouse	IgG2b, k
Iso	Mouse IgG isotype control	MOPC-21	FITC	BioLegend	400138	Mouse	IgG1, κ
Iso	Mouse IgG isotype control	MOPC-21	PE	BioLegend	400111	Mouse	IgG1 K
Iso	Mouse IgG isotype control	MOPC-21	APC	BioLegend	400122	Mouse	IgG1 k
Iso	Mouse IgG isotype control	MOPC-173	APC	BioLegend	400222	Mouse	IgG2a, k
Iso	Mouse IgG isotype control	1F8D3	Coralite+ 647	Proteintech	CL647-66360-1	Mouse	IgG1
Iso	Mouse IgG isotype control	X40	BUV737	BD	612758	Mouse	IgG1 K
Iso	Mouse IgG isotype control	X40	BV711	BD	563044	Mouse	IgG1 K
Iso	Mouse IgG isotype control	mopc-21	BV785	BioLegend	400169	Mouse	IgG1, κ
Iso	Mouse IgG isotype control	polyclonal	AF488	Santa Cruz Biotechnology	sc-32320	Mouse	IgG1
Iso	Mouse IgG isotype control	X40	RB780	BD	568532	Mouse	IgG1 K
Iso	Mouse IgG isotype control	MG2b-57	PE	BioLegend	401208	Mouse	IgG2b, k
