# Supplementary material for: Dissecting type I and II interferon impacts on human immune cells in disease by a cell type-specific interferon response atlas
Source: Research Square preprint supplement (doi:10.21203/rs.3.rs-8197575/v1), 2025-12-23
Supplement: Supplementary file 7 [file c49c3dfebc25c671285cfcb1.xlsx]

## Sheet: Table S5
IFNa_IFNb_Correlation_Stats							IFNa_IFNL1_Correlation_Stats
subtype	Intercept	Slope	Slope_Pval	CI_low	CI_high	Correlation	Intercept	Slope	Slope_Pval	CI_low	CI_high	Correlation
CD4 Naive	-0.00180069	1.05462	0	1.05109	1.05815	0.989599	0.00201927	0.0958517	2.45496e-188	0.0896224	0.102081	0.334825
CD4 Memory	-7.62193e-05	1.01513	0	1.01252	1.01775	0.993508	0.00368652	0.124531	0	0.119329	0.129734	0.475388
Treg	-0.00230518	1.04017	0	1.03474	1.0456	0.975133	0.00132045	0.13754	1.21069e-290	0.130476	0.144604	0.408823
CD8 Naive	-0.00106157	1.04487	0	1.04122	1.04852	0.988207	0.000616456	0.14617	0	0.139124	0.153216	0.42459
CD8 Memory	-0.000774511	1.02413	0	1.02079	1.02746	0.989438	0.00572603	0.308917	0	0.302977	0.314857	0.756411
MAIT	-0.00115377	0.972276	0	0.96453	0.980021	0.940875	0.000899971	0.101533	2.75545e-172	0.094597	0.10847	0.307997
gdT	-0.00219263	0.976735	0	0.969329	0.984141	0.945964	0.00411997	0.26037	0	0.253062	0.267678	0.619
B Naive	0.000434193	1.05286	0	1.05008	1.05565	0.992984	0.00598965	0.595828	0	0.591547	0.600109	0.951749
B Memory	-0.000418358	1.03579	0	1.03355	1.03804	0.994917	0.00633343	0.505576	0	0.501674	0.509477	0.94098
Plasma	0.000242839	0.921059	0	0.910893	0.931226	0.883421	0.00788982	0.674337	0	0.665463	0.683211	0.844771
NK CD56hi	-0.0022855	1.04096	0	1.03808	1.04384	0.991895	0.00150188	0.0298598	1.27417e-71	0.026621	0.0330987	0.195553
NK CD56dim	-0.00341276	1.07247	0	1.07025	1.07468	0.995627	0.00252828	0.0757208	0	0.0729092	0.0785323	0.511739
Monocyte	-0.00331749	1.07525	0	1.07169	1.07881	0.988561	-0.00357056	0.0925281	0	0.0880166	0.0970396	0.407174
