# Supplementary material for: Dissecting type I and II interferon impacts on human immune cells in disease by a cell type-specific interferon response atlas
Source: Research Square preprint supplement (doi:10.21203/rs.3.rs-8197575/v1), 2025-12-23
Supplement: Supplementary file 8 [file f325bea5c6c44fc154bc66a6.xlsx]

## Sheet: Table S12
Type I IFN specific
Mono specific	NK specific	B specific	T specific
CTSL	IL15RA	UBALD2	PGAP1
IL4I1	GTPBP2	MCOLN2	UTRN
RGL1	C1GALT1	INPP1	ATP10A
IER5		CPNE5	UBQLN2
DYSF		TAPBP
IRF2BPL		TMEM268
MXD1		SAMHD1
PARP15		SECISBP2L
RUFY4		RUNX3
LAIR1		ATP13A1
MS4A4A		CD2AP
LILRB4		RABGAP1L
DDIT3		ELMO1
TRIP6		PLAC8
LILRA6		RERE
MARCKS		DNAJA1
ARL8A		ELK4
IFI30		SIDT1
ANXA4		PRKAG2
CD47		IDH3A
PTPA		CHSY1
GRN
DNASE2
MDM2
TMBIM1
CD300E
CCR5
ARHGEF11
CIR1
FNIP2
NINJ1
CTSD
BAX
ANXA2
SUSD1
LAMP1
CREG1
TBC1D2
