# Supplementary material for: Dissecting type I and II interferon impacts on human immune cells in disease by a cell type-specific interferon response atlas
Source: Research Square preprint supplement (doi:10.21203/rs.3.rs-8197575/v1), 2025-12-23
Supplement: Supplementary file 9 [file f6062b8b0302e8a0f31d6dac.xlsx]

## Sheet: Table S6
IFNL1_Boxplot_Stats
celltype.l2	condition1	condition2	p_value	statistic
Plasma	none	IFN-L1	1.54647e-13	1243
Plasma	none	IFNa	5.86172e-19	758
Plasma	IFN-L1	IFNa	0.00263434	2647
Naive	none	IFN-L1	5.66737e-18	840
Naive	none	IFNa	7.77366e-24	382
Naive	IFN-L1	IFNa	0.000138106	2389
Memory	none	IFN-L1	1.04045e-15	1038
Memory	none	IFNa	3.29357e-24	355
Memory	IFN-L1	IFNa	3.09826e-07	1970
CD8 Memory	none	IFN-L1	6.04615e-09	1746
CD8 Memory	none	IFNa	3.30877e-21	579
CD8 Memory	IFN-L1	IFNa	2.34549e-12	1362
gdT	none	IFN-L1	2.89995e-07	1966
gdT	none	IFNa	4.45449e-21	589
gdT	IFN-L1	IFNa	1.35934e-13	1237.5
Other T	none	IFN-L1	0.0145507	2828
Other T	none	IFNa	1.27007e-19	704
Other T	IFN-L1	IFNa	7.24319e-17	935
